# Supplementary material
Source: PubMed Central journal article supplement (PMC1165402)

Figure S1.

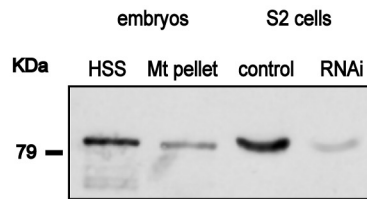

Table S1. Primer sequences for dsRNAi synthesis.

| Gene    | Primer 1 (5' - 3')    | Primer 2 (5' - 3')     |
|---------|-----------------------|------------------------|
| DHC     | aggagtctctcaagcaggtg  | ttggtactgtcacaccactcc  |
| DIC     | atgtccacctgctttgc     | cttgatctcgctaagatg     |
| p50     | tgccaaaggattccaacaccg | tggacttttcggcgatagcatc |
| Asp     | tgttatctgcctgcaacagc  | tttcagctgggcgtaactct   |
| KLP10A* | atgattacggtggggca     | gacatcgatctccttgcg     |
| Ncd     | accaaagaggagctatccgag | ccattcgaatctccatgtcc   |

\*Rogers et al., 2004.

Figure S2.

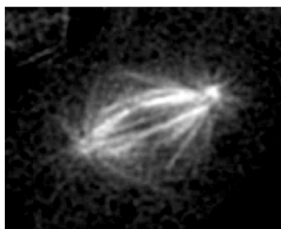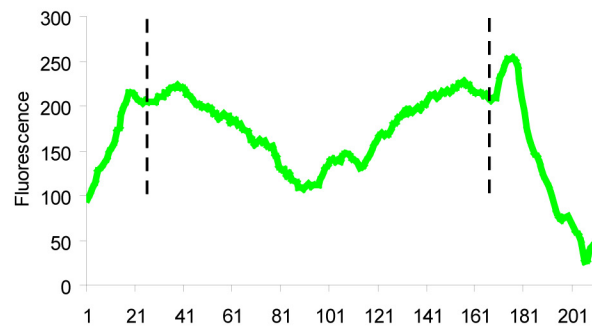

Supplement: mbc_E04-12-1110_1.pdf [file mbc_E04-12-1110_1.pdf]
