# Supplementary material
Source: PubMed Central journal article supplement (PMC1165402)

Figure S3

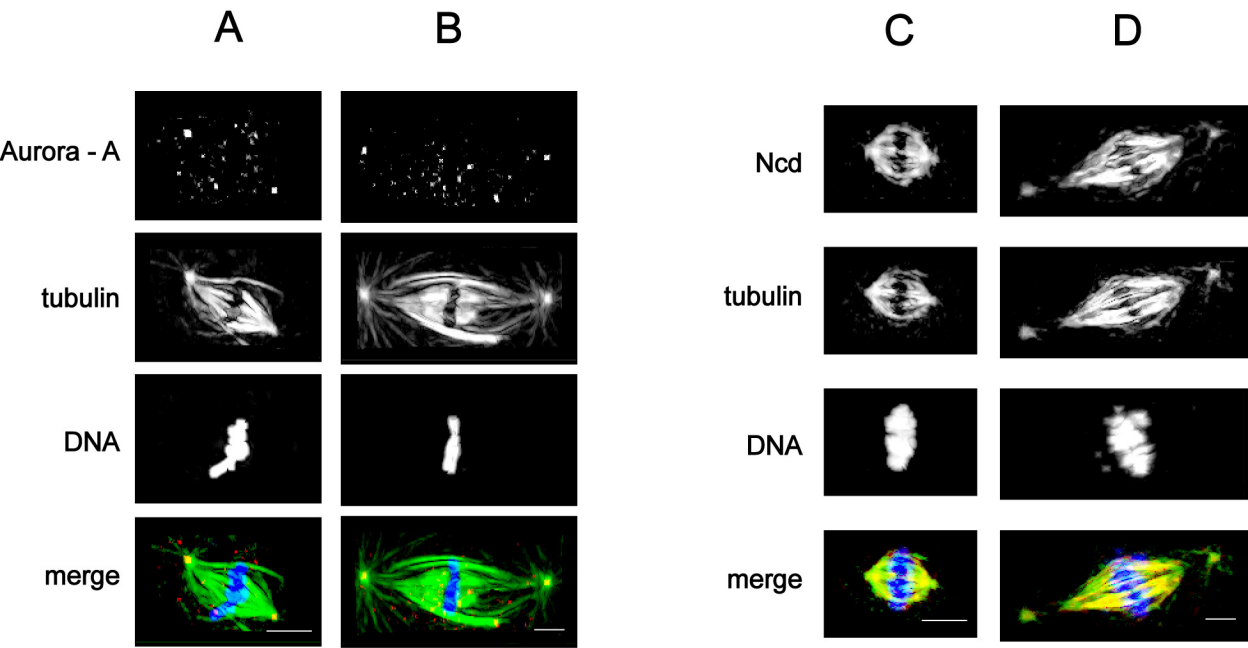

Supplement: mbc_E04-12-1110_2.pdf [file mbc_E04-12-1110_2.pdf]
